# Supplementary material for: Strength Training and All‐Cause, Cardiovascular Disease, and Cancer Mortality in Older Women: A Cohort Study
Source: PubMed Central journal article supplement — J Am Heart Assoc. 2017 Oct 31;6(11):e007677. doi: 10.1161/JAHA.117.007677 (PMC5721806; doi:10.1161/jaha.117.007677), 2017-10-31
Supplement: JAH3-6-e007677-s001.pdf [file JAH3-6-e007677-s001.pdf]

## Supplemental Material

**Figure S1.** Physical Activity Questionnaire, Women's Health Study

**Figure S2.** Unadjusted Cumulative Incidence of Deaths from All-Cause (A), Cardiovascular Diseases (B), and Cancer (C) by Baseline Weekly Time of Strength Training, Women's Health Study (2001-2015)

**Table S1.** Relative Risks of All-Cause Mortality with Strength Training by Subgroup, Women's Health Study (2001-2015)

**Table S2.** Relative Risks of All-Cause Mortality with Strength Training (Simple-Updated and Baseline-Value Models), Women's Health Study (2001-2015)



**Figure S2. Unadjusted Cumulative Incidence of Deaths from All-Cause (A), Cardiovascular Diseases (B), and Cancer (C) by Baseline Weekly Time of Strength Training, Women’s Health Study (2001-2015).**

**A. All-cause death**

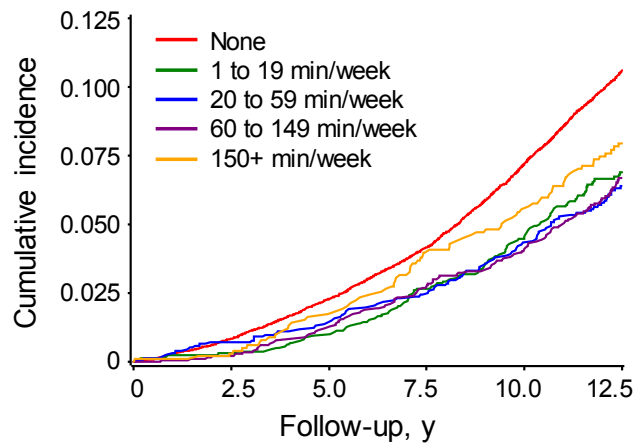

**B. Cardiovascular disease death**

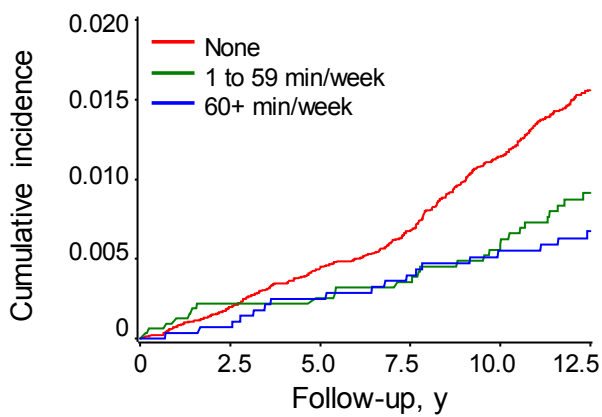

**C. Cancer death**

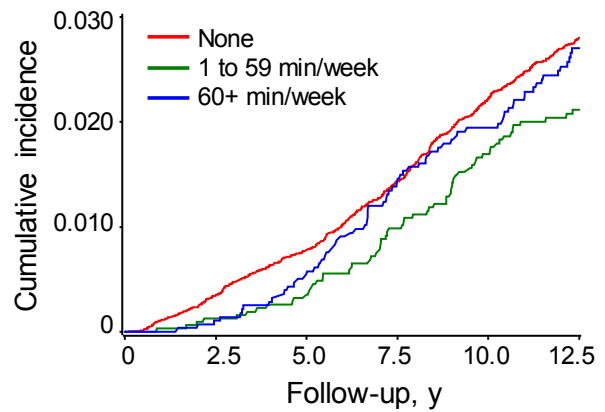

**Table S1. Relative Risks of All-Cause Mortality with Strength Training by Subgroup, Women's Health Study (2001-2015)**

| Subgroup               | Cases (PY)     | Minutes per Week in Strength Training |                   |                   | <i>P</i> for Linear | <i>P</i> for Quadratic | <i>P</i> for Interaction* |
|------------------------|----------------|---------------------------------------|-------------------|-------------------|---------------------|------------------------|---------------------------|
|                        |                | None                                  | 1 to 59 min       | ≥60 min           |                     |                        |                           |
| Age, y                 |                |                                       |                   |                   |                     |                        |                           |
| <60                    | 571 (164 997)  | Reference                             | 0.72 (0.59, 0.89) | 0.83 (0.58, 1.18) | 0.58                | 0.113                  | 0.056                     |
| ≥60                    | 2484 (181 847) | Reference                             | 0.69 (0.62, 0.76) | 0.84 (0.70, 1.02) | 0.198               | <0.001                 |                           |
| BMI, kg/m <sup>2</sup> |                |                                       |                   |                   |                     |                        |                           |
| <25.0                  | 1442 (150 910) | Reference                             | 0.71 (0.62, 0.81) | 0.83 (0.66, 1.05) | 0.41                | <0.001                 | 0.44                      |
| 25 to <30              | 963 (118 964)  | Reference                             | 0.62 (0.53, 0.74) | 0.92 (0.69, 1.23) | 0.68                | 0.034                  |                           |
| ≥30                    | 649 (76 900)   | Reference                             | 0.79 (0.64, 0.98) | 0.74 (0.46, 1.17) | 0.31                | 0.98                   |                           |

Abbreviations: PY, person-years; BMI, body mass index. All values are hazard ratios (95% confidence intervals) based on cumulative average models unless otherwise stated. Cases (PY) are shown based on the categories of baseline physical activities.

Hazard ratios are adjusted for age, race, education, postmenopausal status, hormone use, smoking status, parental history of myocardial infarction or cancer, alcohol intake, energy intake, saturated fat, fiber intake, fruits and vegetables, physical exam for screening, time per week spent in aerobic moderate to vigorous physical activity, body mass index, incidence of hypertension, high cholesterol, cardiovascular diseases, diabetes, and cancer during follow-up, and trial randomization.

\*Interaction test for quadratic associations by using model fit statistics (-2 log likelihood) with and without interaction terms and chi-square test.

**Table S2. Relative Risks of All-Cause Mortality with Strength Training (Simple-Updated and Baseline-Value Models), Women's Health Study (2001-2015)**

|                        | Minutes per Week in Strength Training |                   |                   |                   |                   | P for Linear | P for Quadratic |
|------------------------|---------------------------------------|-------------------|-------------------|-------------------|-------------------|--------------|-----------------|
|                        | None                                  | 1 to 19 min       | 20 to 59 min      | 60 to 149 min     | ≥150 min          |              |                 |
| Cases (person-years)   | 2599 (271 749)                        | 130 (20 224)      | 107 (19 319)      | 133 (23 035)      | 86 (12 515)       |              |                 |
| Simple-updated model*  |                                       |                   |                   |                   |                   |              |                 |
| Multivariable model 1† | Reference                             | 0.64 (0.53, 0.77) | 0.53 (0.43, 0.66) | 0.54 (0.44, 0.65) | 0.58 (0.44, 0.76) | <0.001       | <0.001          |
| Multivariable model 2‡ | Reference                             | 0.79 (0.65, 0.96) | 0.73 (0.59, 0.91) | 0.81 (0.66, 0.99) | 0.88 (0.67, 1.16) | 0.30         | <0.001          |
| Multivariable model 3§ | Reference                             | 0.80 (0.65, 0.97) | 0.68 (0.55, 0.85) | 0.78 (0.64, 0.96) | 0.84 (0.64, 1.11) | 0.14         | <0.001          |
| Baseline-value model   |                                       |                   |                   |                   |                   |              |                 |
| Multivariable model 1† | Reference                             | 0.73 (0.61, 0.87) | 0.68 (0.56, 0.82) | 0.71 (0.60, 0.85) | 0.83 (0.67, 1.03) | 0.006        | <0.001          |
| Multivariable model 2‡ | Reference                             | 0.85 (0.71, 1.03) | 0.80 (0.65, 0.98) | 0.86 (0.71, 1.04) | 1.03 (0.82, 1.30) | 0.97         | 0.003           |
| Multivariable model 3§ | Reference                             | 0.87 (0.73, 1.05) | 0.81 (0.66, 0.99) | 0.86 (0.72, 1.04) | 1.03 (0.81, 1.29) | 0.99         | 0.006           |

All values are hazard ratios (95% confidence intervals) unless otherwise stated. Cases (person-years) are shown based on the categories of baseline physical activities.

\*Simple-updated model uses the most recent value of strength training on a time-varying basis.

†Multivariable model 1 is adjusted for age and trial randomization.

‡Multivariable model 2 is further adjusted for race, education, postmenopausal status, hormone use, smoking status, parental history of myocardial infarction or cancer, alcohol intake, energy intake, saturated fat, fiber intake, fruits and vegetables, physical exam for screening, and time per week spent in aerobic moderate-to-vigorous physical activity.

§Multivariable model 3 is further adjusted for body mass index and incidence of hypertension, high cholesterol, cardiovascular diseases, diabetes, and cancer before and during follow-up (for simple-updated model).

||Baseline-value model uses baseline value of strength training. The model 3 adjusted for body mass index, hypertension, and high cholesterol at baseline.
